# Supplementary material
Source: MDPI journal article supplement (https://www.mdpi.com/2227-7099/11/2/68)
Supplement: s1 [file s1]

## The Results of the Econometric Tests

### 1. The Breusch and Pagan Lagrange Multiplier Test for Random Effects

```
. xtreg share finslack finslack_sq humanslack humanslack_sq Lnturnover Lnasset Lnlabor
lnAGE Firmlocation SOE FOE Manufacturing AFF
```

```
Random-effects GLS regression           Number of obs   =       62,442
Group variable: thuee                   Number of groups  =       12,497
```

```
R-sq:                                Obs per group:
    within = 0.0202                      min =           2
    between = 0.0053                     avg  =          5.0
    overall = 0.0088                     max  =           5
```

```
Wald chi2(13)           =       640.48
Prob > chi2             =       0.0000
```

```
corr(u_i, X) = 0 (assumed)
```

| share         | Coef.     | Std. Err.                         | z      | P> z  | [95% Conf. Interval] |           |
|---------------|-----------|-----------------------------------|--------|-------|----------------------|-----------|
| finslack      | .0158439  | .0045304                          | 3.50   | 0.000 | .0069645             | .0247232  |
| finslack_sq   | -2.62e-06 | 8.49e-07                          | -3.08  | 0.002 | -4.28e-06            | -9.54e-07 |
| humanslack    | -1.126668 | 1.840739                          | -0.61  | 0.540 | -4.734451            | 2.481115  |
| humanslack_sq | .0531092  | .0850551                          | 0.62   | 0.532 | -.1135957            | .2198142  |
| Lnturnover    | -1.343629 | .0552541                          | -24.32 | 0.000 | -1.451925            | -1.235333 |
| Lnasset       | .8397333  | .0564807                          | 14.87  | 0.000 | .7290332             | .9504335  |
| Lnlabor       | .3205719  | .0552365                          | 5.80   | 0.000 | .2123103             | .4288334  |
| lnAGE         | -.0069174 | .1501156                          | -0.05  | 0.963 | -.3011386            | .2873038  |
| Firmlocation  | .0467888  | .14913                            | 0.31   | 0.754 | -.2455005            | .3390782  |
| SOE           | -.1137779 | .3498378                          | -0.33  | 0.745 | -.7994473            | .5718916  |
| FOE           | .0562216  | .1296509                          | 0.43   | 0.665 | -.1978894            | .3103326  |
| Manufacturing | -.7471331 | .7388435                          | -1.01  | 0.312 | -2.19524             | .7009736  |
| AFF           | -.3478193 | .1469291                          | -2.37  | 0.018 | -.6357951            | -.0598436 |
| _cons         | 4.798628  | .4867194                          | 9.86   | 0.000 | 3.844675             | 5.75258   |
| sigma_u       | 3.8443119 |                                   |        |       |                      |           |
| sigma_e       | 11.583306 |                                   |        |       |                      |           |
| rho           | .09921828 | (fraction of variance due to u_i) |        |       |                      |           |

```
. xttest0
```

Breusch and Pagan Lagrangian multiplier test for random effects

```
share[thuee,t] = Xb + u[thuee] + e[thuee,t]
```

Estimated results:

|       | Var      | sd = sqrt(Var) |
|-------|----------|----------------|
| share | 151.7646 | 12.31928       |
| e     | 134.173  | 11.58331       |
| u     | 14.77873 | 3.844312       |

Test: Var(u) = 0

```
chibar2(01) = 1186.30
Prob > chibar2 = 0.0000
```

## 2. The Breusch—Pagan Test to Check for Heteroskedasticity

```
. predict residual, e
(1,000,818 missing values generated)

. gen residualsqr= residual^2
(1,000,818 missing values generated)

. reg residualsqr finslack finslack_sq humanslack humanslack_sq Lnturnover Lnasset
Lnlabour lnAGE Firmlocation SOE FOE Manufacturing AFF
```

|          |  |            |        |            |               |   |        |
|----------|--|------------|--------|------------|---------------|---|--------|
| Source   |  | SS         | df     | MS         | Number of obs | = | 62,442 |
| -----    |  | -----      | -----  | -----      | F(13, 62428)  | = | 17.91  |
| Model    |  | 3.8400e+10 | 13     | 2.9539e+09 | Prob > F      | = | 0.0000 |
| Residual |  | 1.0294e+13 | 62,428 | 164896131  | R-squared     | = | 0.0037 |
| -----    |  | -----      | -----  | -----      | Adj R-squared | = | 0.0035 |
| Total    |  | 1.0333e+13 | 62,441 | 165476784  | Root MSE      | = | 12841  |

|               |  |           |           |        |       |                      |
|---------------|--|-----------|-----------|--------|-------|----------------------|
| residualsqr   |  | Coef.     | Std. Err. | t      | P> t  | [95% Conf. Interval] |
| -----         |  | -----     | -----     | -----  | ----- | -----                |
| finslack      |  | 12.52365  | 4.749642  | 2.64   | 0.008 | 3.21434 21.83295     |
| finslack_sq   |  | -.0020834 | .0008929  | -2.33  | 0.020 | -.0038335 -.0003332  |
| humanslack    |  | -998.8581 | 1928.593  | -0.52  | 0.605 | -4778.904 2781.187   |
| humanslack_sq |  | 34.3269   | 89.18962  | 0.38   | 0.700 | -140.4849 209.1387   |
| Lnturnover    |  | -770.6047 | 52.75345  | -14.61 | 0.000 | -874.0016 -667.2079  |
| Lnasset       |  | 594.3848  | 53.77617  | 11.05  | 0.000 | 488.9834 699.7862    |
| Lnlabour      |  | 154.337   | 50.90629  | 3.03   | 0.002 | 54.56055 254.1134    |
| lnAGE         |  | -163.1793 | 133.2623  | -1.22  | 0.221 | -424.3736 98.01497   |
| Firmlocation  |  | -38.2448  | 135.7114  | -0.28  | 0.778 | -304.2395 227.7499   |
| SOE           |  | -135.887  | 317.6613  | -0.43  | 0.669 | -758.5037 486.7298   |
| FOE           |  | -32.639   | 115.9719  | -0.28  | 0.778 | -259.9441 194.6661   |
| Manufacturing |  | -782.1624 | 659.4182  | -1.19  | 0.236 | -2074.623 510.2987   |
| AFF           |  | -292.1058 | 131.7484  | -2.22  | 0.027 | -550.333 -33.87865   |
| _cons         |  | 2074.404  | 438.3227  | 4.73   | 0.000 | 1215.29 2933.517     |
| -----         |  | -----     | -----     | -----  | ----- | -----                |

## 3. The Wald Test to Check for Serial Correlation

```
. xtserial share finslack finslack_sq humanslack humanslack_sq Lnturnover Lnasset
Lnlabour lnAGE Firmlocation SOE FOE Manufacturing AFF
```

Wooldridge test for autocorrelation in panel data

H0: no first order autocorrelation

F( 1, 12483) = 0.258

Prob > F = 0.6117

#### 4. Unit Root Test of Stationarity (Dickey-Fuller Test)

Null Hypothesis: SHARE has a unit root

Exogenous: Constant

Lag Length: 1 (Automatic - based on SIC, maxlag=1)

|                                        | t-Statistic | Prob.* |
|----------------------------------------|-------------|--------|
| Augmented Dickey-Fuller test statistic | -162.7441   | 0.0001 |
| Test critical values: 1% level         | -3.430286   |        |
| 5% level                               | -2.861396   |        |
| 10% level                              | -2.566733   |        |

\*MacKinnon (1996) one-sided p-values.

Augmented Dickey-Fuller Test Equation

Dependent Variable: D(SHARE)

Method: Least Squares

Date: 01/30/23 Time: 19:23

Sample (adjusted): 3 62442

Included observations: 62440 after adjustments

| Variable           | Coefficient | Std. Error            | t-Statistic | Prob.    |
|--------------------|-------------|-----------------------|-------------|----------|
| SHARE(-1)          | -0.874600   | 0.005374              | -162.7441   | 0.0000   |
| D(SHARE(-1))       | -0.030886   | 0.004000              | -7.721345   | 0.0000   |
| C                  | 0.326149    | 0.049085              | 6.644598    | 0.0000   |
| R-squared          | 0.451760    | Mean dependent var    |             | 9.49E-09 |
| Adjusted R-squared | 0.451743    | S.D. dependent var    |             | 16.55101 |
| S.E. of regression | 12.25510    | Akaike info criterion |             | 7.849809 |
| Sum squared resid  | 9377248.    | Schwarz criterion     |             | 7.850243 |
| Log likelihood     | -245068.0   | Hannan-Quinn criter.  |             | 7.849943 |
| F-statistic        | 25724.67    | Durbin-Watson stat    |             | 2.001925 |
| Prob(F-statistic)  | 0.000000    |                       |             |          |

Null Hypothesis: FINSLACK has a unit root

Exogenous: Constant

Lag Length: 0 (Automatic - based on SIC, maxlag=1)

|                                        | t-Statistic | Prob.* |
|----------------------------------------|-------------|--------|
| Augmented Dickey-Fuller test statistic | -243.8352   | 0.0001 |
| Test critical values: 1% level         | -3.430286   |        |
| 5% level                               | -2.861396   |        |
| 10% level                              | -2.566733   |        |

\*MacKinnon (1996) one-sided p-values.

Augmented Dickey-Fuller Test Equation

Dependent Variable: D(FINSLACK)

Method: Least Squares

Date: 01/30/23 Time: 19:24

Sample (adjusted): 2 62442  
Included observations: 62441 after adjustments

| Variable           | Coefficient | Std. Error            | t-Statistic | Prob.     |
|--------------------|-------------|-----------------------|-------------|-----------|
| FINSLACK(-1)       | -0.975525   | 0.004001              | -243.8352   | 0.0000    |
| C                  | 1.560626    | 0.134008              | 11.64574    | 0.0000    |
| R-squared          | 0.487762    | Mean dependent var    |             | -1.88E-05 |
| Adjusted R-squared | 0.487754    | S.D. dependent var    |             | 46.73385  |
| S.E. of regression | 33.44805    | Akaike info criterion |             | 9.857896  |
| Sum squared resid  | 69855001    | Schwarz criterion     |             | 9.858186  |
| Log likelihood     | -307766.4   | Hannan-Quinn criter.  |             | 9.857986  |
| F-statistic        | 59455.59    | Durbin-Watson stat    |             | 2.000265  |
| Prob(F-statistic)  | 0.000000    |                       |             |           |

Null Hypothesis: HUMANSLACK has a unit root  
Exogenous: Constant  
Lag Length: 0 (Automatic - based on SIC, maxlag=1)

|                                        | t-Statistic | Prob.* |
|----------------------------------------|-------------|--------|
| Augmented Dickey-Fuller test statistic | -248.3391   | 0.0001 |
| Test critical values:                  |             |        |
| 1% level                               | -3.430286   |        |
| 5% level                               | -2.861396   |        |
| 10% level                              | -2.566733   |        |

\*MacKinnon (1996) one-sided p-values.

Augmented Dickey-Fuller Test Equation  
Dependent Variable: D(HUMANSLACK)  
Method: Least Squares  
Date: 01/30/23 Time: 19:26  
Sample (adjusted): 2 62442  
Included observations: 62441 after adjustments

| Variable           | Coefficient | Std. Error            | t-Statistic | Prob.     |
|--------------------|-------------|-----------------------|-------------|-----------|
| HUMANSLACK(-1)     | -0.993822   | 0.004002              | -248.3391   | 0.0000    |
| C                  | 0.003622    | 0.000558              | 6.490110    | 0.0000    |
| R-squared          | 0.496911    | Mean dependent var    |             | 6.32E-09  |
| Adjusted R-squared | 0.496903    | S.D. dependent var    |             | 0.196541  |
| S.E. of regression | 0.139405    | Akaike info criterion |             | -1.102830 |
| Sum squared resid  | 1213.430    | Schwarz criterion     |             | -1.102540 |
| Log likelihood     | 34432.89    | Hannan-Quinn criter.  |             | -1.102740 |
| F-statistic        | 61672.30    | Durbin-Watson stat    |             | 2.000029  |
| Prob(F-statistic)  | 0.000000    |                       |             |           |

Null Hypothesis: LNASSET has a unit root  
Exogenous: Constant  
Lag Length: 0 (Automatic - based on SIC, maxlag=1)

|                                        | t-Statistic | Prob.* |
|----------------------------------------|-------------|--------|
| Augmented Dickey-Fuller test statistic | -86.55868   | 0.0001 |
| Test critical values:                  |             |        |
| 1% level                               | -3.430286   |        |
| 5% level                               | -2.861396   |        |
| 10% level                              | -2.566733   |        |

\*MacKinnon (1996) one-sided p-values.

#### Augmented Dickey-Fuller Test Equation

Dependent Variable: D(LNASSET)

Method: Least Squares

Date: 01/30/23 Time: 19:27

Sample (adjusted): 2 62442

Included observations: 62441 after adjustments

| Variable           | Coefficient | Std. Error            | t-Statistic | Prob.  |
|--------------------|-------------|-----------------------|-------------|--------|
| LNASSET(-1)        | -0.214247   | 0.002475              | -86.55868   | 0.0000 |
| C                  | 2.346234    | 0.027487              | 85.35654    | 0.0000 |
| R-squared          | 0.107139    | Mean dependent var    | -4.94E-05   |        |
| Adjusted R-squared | 0.107125    | S.D. dependent var    | 1.206359    |        |
| S.E. of regression | 1.139913    | Akaike info criterion | 3.099813    |        |

Null Hypothesis: LNLABOR has a unit root

Exogenous: Constant

Lag Length: 0 (Automatic - based on SIC, maxlag=1)

|                                        | t-Statistic | Prob.* |
|----------------------------------------|-------------|--------|
| Augmented Dickey-Fuller test statistic | -81.54256   | 0.0001 |
| Test critical values:                  |             |        |
| 1% level                               | -3.430286   |        |
| 5% level                               | -2.861396   |        |
| 10% level                              | -2.566733   |        |

\*MacKinnon (1996) one-sided p-values.

#### Augmented Dickey-Fuller Test Equation

Dependent Variable: D(LNLABOR)

Method: Least Squares

Date: 01/30/23 Time: 19:27

Sample (adjusted): 2 62442

Included observations: 62441 after adjustments

| Variable           | Coefficient | Std. Error            | t-Statistic | Prob.  |
|--------------------|-------------|-----------------------|-------------|--------|
| LNLABOR(-1)        | -0.192465   | 0.002360              | -81.54256   | 0.0000 |
| C                  | 0.869736    | 0.011347              | 76.64803    | 0.0000 |
| R-squared          | 0.096242    | Mean dependent var    | -5.85E-05   |        |
| Adjusted R-squared | 0.096228    | S.D. dependent var    | 1.017260    |        |
| S.E. of regression | 0.967078    | Akaike info criterion | 2.770957    |        |

|                   |           |                      |          |
|-------------------|-----------|----------------------|----------|
| Sum squared resid | 58395.44  | Schwarz criterion    | 2.771246 |
| Log likelihood    | -86508.66 | Hannan-Quinn criter. | 2.771047 |
| F-statistic       | 6649.190  | Durbin-Watson stat   | 1.987261 |
| Prob(F-statistic) | 0.000000  |                      |          |

Null Hypothesis: LNTURNOVER has a unit root  
Exogenous: Constant  
Lag Length: 0 (Automatic - based on SIC, maxlag=1)

|                                        | t-Statistic | Prob.* |
|----------------------------------------|-------------|--------|
| Augmented Dickey-Fuller test statistic | -89.14051   | 0.0001 |
| Test critical values: 1% level         | -3.430286   |        |
| 5% level                               | -2.861396   |        |
| 10% level                              | -2.566733   |        |

\*MacKinnon (1996) one-sided p-values.

Augmented Dickey-Fuller Test Equation  
Dependent Variable: D(LNTURNOVER)  
Method: Least Squares  
Date: 01/30/23 Time: 19:28  
Sample (adjusted): 2 62442  
Included observations: 62441 after adjustments

| Variable           | Coefficient | Std. Error            | t-Statistic | Prob.  |
|--------------------|-------------|-----------------------|-------------|--------|
| LNTURNOVER(-1)     | -0.225756   | 0.002533              | -89.14051   | 0.0000 |
| C                  | 2.499764    | 0.028476              | 87.78608    | 0.0000 |
| R-squared          | 0.112894    | Mean dependent var    | -5.90E-05   |        |
| Adjusted R-squared | 0.112880    | S.D. dependent var    | 1.310956    |        |
| S.E. of regression | 1.234751    | Akaike info criterion | 3.259648    |        |
| Sum squared resid  | 95195.13    | Schwarz criterion     | 3.259937    |        |
| Log likelihood     | -101765.8   | Hannan-Quinn criter.  | 3.259738    |        |
| F-statistic        | 7946.031    | Durbin-Watson stat    | 1.996091    |        |
| Prob(F-statistic)  | 0.000000    |                       |             |        |

Null Hypothesis: SOE has a unit root  
Exogenous: Constant  
Lag Length: 1 (Automatic - based on SIC, maxlag=1)

|                                        | t-Statistic | Prob.* |
|----------------------------------------|-------------|--------|
| Augmented Dickey-Fuller test statistic | -81.55349   | 0.0001 |
| Test critical values: 1% level         | -3.430286   |        |
| 5% level                               | -2.861396   |        |
| 10% level                              | -2.566733   |        |

\*MacKinnon (1996) one-sided p-values.

# Augmented Dickey-Fuller Test Equation

Dependent Variable: D(SOE)

Method: Least Squares

Date: 01/30/23 Time: 20:17

Sample (adjusted): 3 62442

Included observations: 62440 after adjustments

| Variable           | Coefficient | Std. Error            | t-Statistic | Prob.  |
|--------------------|-------------|-----------------------|-------------|--------|
| SOE(-1)            | -0.208291   | 0.002554              | -81.55349   | 0.0000 |
| D(SOE(-1))         | 0.020568    | 0.004000              | 5.142057    | 0.0000 |
| C                  | 0.006252    | 0.000421              | 14.86364    | 0.0000 |
| R-squared          | 0.102561    | Mean dependent var    | -1.60E-05   |        |
| Adjusted R-squared | 0.102532    | S.D. dependent var    | 0.109085    |        |
| S.E. of regression | 0.103342    | Akaike info criterion | -1.701502   |        |
| Sum squared resid  | 666.7972    | Schwarz criterion     | -1.701068   |        |
| Log likelihood     | 53123.90    | Hannan-Quinn criter.  | -1.701368   |        |
| F-statistic        | 3567.708    | Durbin-Watson stat    | 2.002260    |        |
| Prob(F-statistic)  | 0.000000    |                       |             |        |

Null Hypothesis: FOE has a unit root

Exogenous: Constant

Lag Length: 1 (Automatic - based on SIC, maxlag=1)

|                                        | t-Statistic | Prob.* |
|----------------------------------------|-------------|--------|
| Augmented Dickey-Fuller test statistic | -76.85998   | 0.0001 |
| Test critical values:                  |             |        |
| 1% level                               | -3.430286   |        |
| 5% level                               | -2.861396   |        |
| 10% level                              | -2.566733   |        |

\*MacKinnon (1996) one-sided p-values.

# Augmented Dickey-Fuller Test Equation

Dependent Variable: D(FOE)

Method: Least Squares

Date: 01/30/23 Time: 20:19

Sample (adjusted): 3 62442

Included observations: 62440 after adjustments

| Variable           | Coefficient | Std. Error            | t-Statistic | Prob.  |
|--------------------|-------------|-----------------------|-------------|--------|
| FOE(-1)            | -0.176268   | 0.002293              | -76.85998   | 0.0000 |
| D(FOE(-1))         | 0.068493    | 0.003993              | 17.15343    | 0.0000 |
| C                  | 0.078749    | 0.001498              | 52.58698    | 0.0000 |
| R-squared          | 0.086789    | Mean dependent var    | 0.000000    |        |
| Adjusted R-squared | 0.086760    | S.D. dependent var    | 0.285572    |        |
| S.E. of regression | 0.272903    | Akaike info criterion | 0.240650    |        |
| Sum squared resid  | 4650.071    | Schwarz criterion     | 0.241084    |        |
| Log likelihood     | -7510.078   | Hannan-Quinn criter.  | 0.240784    |        |
| F-statistic        | 2966.915    | Durbin-Watson stat    | 2.010724    |        |
| Prob(F-statistic)  | 0.000000    |                       |             |        |

Null Hypothesis: MANUFACTURING has a unit root  
 Exogenous: Constant  
 Lag Length: 1 (Automatic - based on SIC, maxlag=1)

|                                        | t-Statistic | Prob.* |
|----------------------------------------|-------------|--------|
| Augmented Dickey-Fuller test statistic | -79.23838   | 0.0001 |
| Test critical values: 1% level         | -3.430286   |        |
| 5% level                               | -2.861396   |        |
| 10% level                              | -2.566733   |        |

\*MacKinnon (1996) one-sided p-values.

Augmented Dickey-Fuller Test Equation  
 Dependent Variable: D(MANUFACTURING)  
 Method: Least Squares  
 Date: 01/30/23 Time: 20:16  
 Sample (adjusted): 3 62442  
 Included observations: 62440 after adjustments

| Variable             | Coefficient | Std. Error            | t-Statistic | Prob.     |
|----------------------|-------------|-----------------------|-------------|-----------|
| MANUFACTURING(-1)    | -0.191507   | 0.002417              | -79.23838   | 0.0000    |
| D(MANUFACTURING(-1)) | 0.047808    | 0.003997              | 11.95967    | 0.0000    |
| C                    | 0.001233    | 0.000185              | 6.667861    | 0.0000    |
| R-squared            | 0.093461    | Mean dependent var    |             | 0.000000  |
| Adjusted R-squared   | 0.093432    | S.D. dependent var    |             | 0.048356  |
| S.E. of regression   | 0.046041    | Akaike info criterion |             | -3.318503 |
| Sum squared resid    | 132.3547    | Schwarz criterion     |             | -3.318069 |
| Log likelihood       | 103606.7    | Hannan-Quinn criter.  |             | -3.318368 |
| F-statistic          | 3218.522    | Durbin-Watson stat    |             | 2.009373  |
| Prob(F-statistic)    | 0.000000    |                       |             |           |

Null Hypothesis: AFF has a unit root  
 Exogenous: Constant  
 Lag Length: 1 (Automatic - based on SIC, maxlag=1)

|                                        | t-Statistic | Prob.* |
|----------------------------------------|-------------|--------|
| Augmented Dickey-Fuller test statistic | -70.12552   | 0.0001 |
| Test critical values: 1% level         | -3.430286   |        |
| 5% level                               | -2.861396   |        |
| 10% level                              | -2.566733   |        |

\*MacKinnon (1996) one-sided p-values.

Augmented Dickey-Fuller Test Equation  
 Dependent Variable: D(AFF)  
 Method: Least Squares  
 Date: 01/30/23 Time: 20:18  
 Sample (adjusted): 3 62442  
 Included observations: 62440 after adjustments



| Variable           | Coefficient | Std. Error            | t-Statistic | Prob.  |
|--------------------|-------------|-----------------------|-------------|--------|
| AFF(-1)            | -0.149608   | 0.002133              | -70.12552   | 0.0000 |
| D(AFF(-1))         | 0.050323    | 0.003997              | 12.59019    | 0.0000 |
| C                  | 0.097343    | 0.001699              | 57.27741    | 0.0000 |
| R-squared          | 0.073566    | Mean dependent var    | -1.60E-05   |        |
| Adjusted R-squared | 0.073537    | S.D. dependent var    | 0.254463    |        |
| S.E. of regression | 0.244928    | Akaike info criterion | 0.024341    |        |
| Sum squared resid  | 3745.572    | Schwarz criterion     | 0.024776    |        |
| Log likelihood     | -756.9349   | Hannan-Quinn criter.  | 0.024476    |        |
| F-statistic        | 2478.999    | Durbin-Watson stat    | 2.007861    |        |
| Prob(F-statistic)  | 0.000000    |                       |             |        |
